# Supplementary material for: Crystal structures of new silver ion conductors Ag7Fe3(X2O7)4 (X = P, As)
Source: Royal Society of Chemistry journal article supplement (doi:10.1039/b819846b), 2009-01-01
Supplement: b819846b.pdf [file b819846b.pdf]

## Crystal structures of new silver ion conductors $\text{Ag}_7\text{Fe}_3(\text{X}_2\text{O}_7)_4$ ( $\text{X} = \text{P}, \text{As}$ )

Eric Quarez,<sup>a</sup> Olivier Mentré,<sup>b</sup> Yassine Oumellal<sup>a</sup> and Christian Masquelier<sup>a</sup>

Table 1. Crystal data, data collection and structure refinement parameters for  $\text{Ag}_7\text{Fe}_3(\text{P}_2\text{O}_7)_4$  and  $\text{Ag}_7\text{Fe}_3(\text{As}_2\text{O}_7)_4$  at 100 and 298 K.

|                                                                         | $\text{Ag}_7\text{Fe}_3(\text{P}_2\text{O}_7)_4$                         |                                                                            | $\text{Ag}_7\text{Fe}_3(\text{As}_2\text{O}_7)_4$                    |                                                                      |
|-------------------------------------------------------------------------|--------------------------------------------------------------------------|----------------------------------------------------------------------------|----------------------------------------------------------------------|----------------------------------------------------------------------|
| Temperature (K)                                                         | 100                                                                      | 298                                                                        | 100                                                                  | 298                                                                  |
| Crystal symmetry                                                        | Monoclinic                                                               | Monoclinic                                                                 | Monoclinic                                                           | Monoclinic                                                           |
| Space group                                                             | $\text{P}2_1/\text{c}$ ( $n^{\circ}14$ )                                 | $\text{C}2/\text{c}$ ( $n^{\circ}15$ )                                     | $\text{P}2_1/\text{c}$ ( $n^{\circ}14$ )                             | $\text{C}2/\text{c}$ ( $n^{\circ}15$ )                               |
| a (Å)                                                                   | 9.532(3)                                                                 | 9.5561(5)                                                                  | 9.914(1)                                                             | 9.9285(3)                                                            |
| b (Å)                                                                   | 8.421(2)                                                                 | 8.4417(4)                                                                  | 8.607(1)                                                             | 8.6101(2)                                                            |
| c (Å)                                                                   | 28.021(7)                                                                | 28.226(1)                                                                  | 28.904(4)                                                            | 29.0390(8)                                                           |
| $\beta$ (°)                                                             | 93.225(5)                                                                | 93.465(2)                                                                  | 93.317(2)                                                            | 93.523(1)                                                            |
| V (Å <sup>3</sup> )                                                     | 2245(1)                                                                  | 2272.8(3)                                                                  | 2462.2(7)                                                            | 2477.7(2)                                                            |
| Z                                                                       | 4                                                                        | 4                                                                          | 4                                                                    | 4                                                                    |
| Calculated density (g/cm <sup>3</sup> )                                 | 4.785                                                                    | 4.731                                                                      | 5.316                                                                | 5.283                                                                |
| Equipment                                                               | Bruker SMART CCD 1K                                                      | Bruker X8                                                                  | Bruker SMART CCD 1K                                                  | Bruker X8                                                            |
| Radiation MoK $\alpha$ (Å)                                              | 0.71073                                                                  | 0.71073                                                                    | 0.71073                                                              | 0.71073                                                              |
| Scan mode                                                               | $\omega$ - scan                                                          | $\omega$ - scan                                                            | $\omega$ - scan                                                      | $\omega$ - scan                                                      |
| Recording angular range 2 $\theta$ (°)                                  | 5.04-58.12                                                               | 2.90-73.70                                                                 | 4.86-57.30                                                           | 2.82-86.72                                                           |
| Recording reciprocal space                                              | $-12 \leq h \leq 12$<br>$0 \leq k \leq 11$<br>$0 \leq l \leq 37$         | $-16 \leq h \leq 16$<br>$0 \leq k \leq 14$<br>$0 \leq l \leq 47$           | $-13 \leq h \leq 13$<br>$-11 \leq k \leq 11$<br>$-38 \leq l \leq 38$ | $-15 \leq h \leq 19$<br>$-12 \leq k \leq 16$<br>$-56 \leq l \leq 44$ |
| Number of measured reflections                                          | 5399                                                                     | 5703                                                                       | 19136                                                                | 31808                                                                |
| Number of independent reflections<br>[ $I > 3\sigma(I)$ ]               | 3803                                                                     | 5254                                                                       | 4377                                                                 | 7562                                                                 |
| R merging factor                                                        | 5.08                                                                     | 3.44                                                                       | 4.76                                                                 | 4.12                                                                 |
| $\mu$ (mm <sup>-1</sup> ) for MoK $\alpha$                              | 8.546                                                                    | 8.444                                                                      | 17.945                                                               | 17.833                                                               |
| Twin matrix                                                             | $\begin{pmatrix} -1 & 0 & 0.33 \\ 0 & -1 & 0 \\ 0 & 0 & 1 \end{pmatrix}$ | $\begin{pmatrix} -1 & 0 & 0.3571 \\ 0 & -1 & 0 \\ 0 & 0 & 1 \end{pmatrix}$ | /                                                                    | /                                                                    |
| Twin ratio (%)                                                          | 0.886(1)/0.114                                                           | 0.893(1)/0.107                                                             | /                                                                    | /                                                                    |
| Number of refined parameters /<br>equations                             | 402 / none                                                               | 257 / (2)                                                                  | 380 / (1)                                                            | 276 / (3)                                                            |
| Refinement method                                                       | Least squares on F                                                       | Least squares on F                                                         | Least squares on F                                                   | Least squares on F                                                   |
| R <sub>1</sub> (F) [ $I > 3\sigma(I)$ ] (%) <sup>a</sup>                | 3.83                                                                     | 4.22                                                                       | 4.09                                                                 | 3.16                                                                 |
| wR <sub>2</sub> (F <sup>2</sup> ) [ $I > 3\sigma(I)$ ] (%) <sup>b</sup> | 4.14                                                                     | 4.69                                                                       | 4.10                                                                 | 3.32                                                                 |
| Weighting scheme                                                        | unit                                                                     | unit                                                                       | unit                                                                 | unit                                                                 |
| Goodness of fit                                                         | 1.92                                                                     | 1.61                                                                       | 1.82                                                                 | 1.24                                                                 |
| Isotropic secondary extinction (type I)                                 | 0.023(2)                                                                 | 0.029(2)                                                                   | 0.084(2)                                                             | 0.195(2)                                                             |
| Min / Max $\Delta\rho$ e/Å <sup>3</sup>                                 | -1.06/1.86                                                               | -1.13/1.61                                                                 | -0.90/1.87                                                           | -1.44/1.93                                                           |

(1)  $\text{ai}[\text{Ag}2\text{b}] = 5 - \text{ai}[\text{Ag}2\text{a}] - \text{ai}[\text{Ag}3\text{a}] - \text{ai}[\text{Ag}3\text{b}] - \text{ai}[\text{Ag}4\text{a}] - \text{ai}[\text{Ag}4\text{b}]$

(2)  $\text{ai}[\text{Ag}1] = 1 - \text{ai}[\text{Ag}1']$ ;  $\text{ai}[\text{Ag}2] = 2.5 - \text{ai}[\text{Ag}3] - \text{ai}[\text{Ag}3'] - \text{ai}[\text{Ag}3''] - \text{ai}[\text{Ag}4] - \text{ai}[\text{Ag}4']$

(3)  $\text{ai}[\text{Ag}1] = 1 - \text{ai}[\text{Ag}1']$ ;  $\text{ai}[\text{Ag}2] = 2.5 - \text{ai}[\text{Ag}2'] - \text{ai}[\text{Ag}3] - \text{ai}[\text{Ag}3'] - \text{ai}[\text{Ag}3''] - \text{ai}[\text{Ag}4] - \text{ai}[\text{Ag}4'] - \text{ai}[\text{Ag}4'']$

$$^a R_1 (F) = \frac{\sum |F_o| - |F_c|}{\sum |F_o|} \cdot \quad ^b wR_2 (F^2) = \left[ \frac{\sum w(F_o^2 - F_c^2)^2}{\sum w(F_o^2)} \right]^{1/2}$$

Table 2. Atomic parameters, equivalent isotropic displacement parameters for  $\alpha$ -Ag<sub>7</sub>Fe<sub>3</sub>(P<sub>2</sub>O<sub>7</sub>)<sub>4</sub> (100 K) and bond valence sums (BVS) for the cations.

| Atom | Wyck. | sof | x           | y          | z           | U <sub>eq</sub> <sup>a</sup> (Å <sup>2</sup> ) | BVS   |
|------|-------|-----|-------------|------------|-------------|------------------------------------------------|-------|
| Ag1a | 4e    | 1   | 0.49290(9)  | 0.1364(1)  | 0.05432(3)  | 0.0096(2)                                      | 1.196 |
| Ag1b | 4e    | 1   | 0.99959(9)  | -0.6461(1) | -0.06121(3) | 0.0112(2)                                      | 1.179 |
| Ag2a | 4e    | 1   | 0.24036(9)  | 0.0957(1)  | 0.35397(3)  | 0.0102(2)                                      | 0.982 |
| Ag2b | 4e    | 1   | 0.22920(9)  | 0.0703(1)  | 0.14246(3)  | 0.0102(2)                                      | 0.926 |
| Ag3a | 4e    | 1   | 0.7486(1)   | 0.1544(1)  | 0.17181(4)  | 0.0195(2)                                      | 0.844 |
| Ag3b | 4e    | 1   | -0.21506(9) | 0.1877(1)  | 0.31134(4)  | 0.0163(2)                                      | 0.873 |
| Ag4a | 4e    | 1   | 0.4588(1)   | 0.3580(1)  | 0.14723(3)  | 0.0172(2)                                      | 0.955 |
| Fe1  | 4e    | 1   | 0.2484(2)   | 0.3262(2)  | 0.25142(5)  | 0.0061(4)                                      | 3.027 |
| Fe2a | 4e    | 1   | 0.4328(2)   | -0.2784(2) | 0.06431(5)  | 0.0053(4)                                      | 3.083 |
| Fe2b | 4e    | 1   | 0.9329(2)   | 0.2215(2)  | 0.06349(5)  | 0.0053(4)                                      | 3.085 |
| P1a  | 4e    | 1   | 0.5464(3)   | 0.5094(3)  | 0.2443(1)   | 0.0056(7)                                      | 4.894 |
| P1b  | 4e    | 1   | -0.0493(3)  | 0.5049(3)  | 0.2545(1)   | 0.0070(7)                                      | 4.909 |
| P2a  | 4e    | 1   | 0.4791(3)   | 0.3878(3)  | 0.33519(9)  | 0.0062(7)                                      | 4.855 |
| P2b  | 4e    | 1   | 0.0290(3)   | 0.3823(3)  | 0.16526(9)  | 0.0058(7)                                      | 4.822 |
| P3a  | 4e    | 1   | 0.7428(3)   | -0.0919(3) | 0.0580(1)   | 0.0057(7)                                      | 4.896 |
| P3b  | 4e    | 1   | 0.7603(3)   | -0.4111(3) | -0.05548(9) | 0.0052(7)                                      | 4.962 |
| P4a  | 4e    | 1   | 0.1683(3)   | -0.0386(3) | 0.0332(1)   | 0.0061(7)                                      | 4.984 |
| P4b  | 4e    | 1   | 0.6669(3)   | -0.5404(3) | 0.03479(9)  | 0.0051(7)                                      | 4.917 |
| O1a  | 4e    | 1   | 0.6213(8)   | 0.4406(9)  | 0.2027(3)   | 0.008(2)                                       |       |
| O1b  | 4e    | 1   | -0.1259(8)  | 0.439(1)   | 0.2954(3)   | 0.010(2)                                       |       |
| O2a  | 4e    | 1   | 0.6056(7)   | 0.6660(9)  | 0.2622(3)   | 0.005(1) <sup>b</sup>                          |       |
| O2b  | 4e    | 1   | -0.1077(8)  | 0.6615(9)  | 0.2348(3)   | 0.008(2)                                       |       |
| O3a  | 4e    | 1   | 0.3862(8)   | 0.5115(9)  | 0.2362(3)   | 0.010(2)                                       |       |
| O3b  | 4e    | 1   | 0.1106(8)   | 0.5097(9)  | 0.2636(3)   | 0.007(2)                                       |       |
| O4a  | 4e    | 1   | 0.5729(8)   | 0.3882(9)  | 0.2889(3)   | 0.008(2)                                       |       |
| O4b  | 4e    | 1   | -0.0700(7)  | 0.3798(9)  | 0.2107(3)   | 0.008(2)                                       |       |
| O5a  | 4e    | 1   | 0.1779(7)   | 0.330(1)   | 0.1838(3)   | 0.010(2)                                       |       |
| O5b  | 4e    | 1   | 0.3283(7)   | 0.345(1)   | 0.3178(3)   | 0.010(2)                                       |       |
| O6a  | 4e    | 1   | 0.4859(8)   | 0.5538(9)  | 0.3568(3)   | 0.010(2)                                       |       |
| O6b  | 4e    | 1   | 0.0265(8)   | 0.5478(9)  | 0.1450(3)   | 0.008(2)                                       |       |
| O7a  | 4e    | 1   | 0.5467(7)   | 0.2568(9)  | 0.3656(3)   | 0.008(2)                                       |       |
| O7b  | 4e    | 1   | -0.0393(8)  | 0.2531(9)  | 0.1338(3)   | 0.009(2)                                       |       |
| O8a  | 4e    | 1   | 0.7291(8)   | -0.5773(9) | -0.0746(3)  | 0.007(2)                                       |       |
| O8b  | 4e    | 1   | 0.7707(8)   | 0.0775(9)  | 0.0763(3)   | 0.008(2)                                       |       |
| O9a  | 4e    | 1   | 0.5846(8)   | -0.1235(9) | 0.0503(3)   | 0.009(2)                                       |       |
| O9b  | 4e    | 1   | 0.9174(7)   | -0.3802(9) | -0.0487(3)  | 0.006(1) <sup>b</sup>                          |       |
| O10a | 4e    | 1   | 0.6854(8)   | -0.2832(9) | -0.0849(2)  | 0.005(2)                                       |       |
| O10b | 4e    | 1   | 0.8177(8)   | -0.2191(9) | 0.0867(3)   | 0.009(2)                                       |       |
| O11a | 4e    | 1   | 0.2000(7)   | 0.0942(9)  | -0.0048(3)  | 0.005(2)                                       |       |
| O11b | 4e    | 1   | 0.7039(8)   | -0.406(1)  | -0.0027(3)  | 0.009(2)                                       |       |
| O12a | 4e    | 1   | 0.0981(7)   | -0.1777(9) | 0.0059(3)   | 0.007(1) <sup>b</sup>                          |       |
| O12b | 4e    | 1   | 0.5967(7)   | -0.6770(9) | 0.0060(3)   | 0.007(2)                                       |       |
| O13a | 4e    | 1   | 0.8019(8)   | -0.592(1)  | 0.0607(3)   | 0.011(2)                                       |       |
| O13b | 4e    | 1   | 0.3054(7)   | -0.0876(9) | 0.0590(3)   | 0.009(2)                                       |       |
| O14a | 4e    | 1   | 0.5698(7)   | -0.4616(9) | 0.0693(3)   | 0.006(2)                                       |       |
| O14b | 4e    | 1   | 0.0721(8)   | 0.0400(9)  | 0.0673(3)   | 0.009(2)                                       |       |

$$^a U_{eq} = 1/3 \left( \sum_{ij} U_{ij} a_i^* b_j^* a_j \right)$$

$$^b U_{iso}$$

Table 3. Atomic parameters and equivalent isotropic displacement parameters for  $\alpha$ -Ag<sub>7</sub>Fe<sub>3</sub>(As<sub>2</sub>O<sub>7</sub>)<sub>4</sub> (100 K) and bond valence sums (BVS) for the cations.

| Atom | Wyck. sof | x        | y          | z          | U <sub>eq</sub> <sup>a</sup> (Å <sup>2</sup> ) | BVS                   |
|------|-----------|----------|------------|------------|------------------------------------------------|-----------------------|
| Ag1a | 4e        | 1        | 0.48612(8) | 0.1323(1)  | 0.05239(3)                                     | 0.0090(2)1.033        |
| Ag1b | 4e        | 1        | 1.00671(9) | -0.6392(1) | -0.05821(3)                                    | 0.0119(2)1.081        |
| Ag2a | 4e        | 0.993(4) | 0.2403(1)  | 0.1022(1)  | 0.35093(3)                                     | 0.0144(3)0.951        |
| Ag2b | 4e        | 0.95(1)  | 0.2284(1)  | 0.0833(1)  | 0.14210(3)                                     | 0.0135(3)0.915        |
| Ag3a | 4e        | 0.902(4) | 0.7581(1)  | 0.1525(1)  | 0.16910(4)                                     | 0.0226(3)0.769        |
| Ag3b | 4e        | 0.948(4) | -0.2200(1) | 0.1934(1)  | 0.31273(4)                                     | 0.0238(3)0.806        |
| Ag4a | 4e        | 0.963(4) | 0.4580(1)  | 0.3548(1)  | 0.14929(3)                                     | 0.0220(3)0.945        |
| Ag4b | 4e        | 0.239(6) | 0.0398(8)  | 0.130(1)   | 0.8529(2)                                      | 0.070(3) 0.831        |
| As1a | 4e        | 1        | 0.5459(1)  | 0.5285(1)  | 0.24359(4)                                     | 0.0052(3)4.839        |
| As1b | 4e        | 1        | -0.0524(1) | 0.5166(1)  | 0.25641(4)                                     | 0.0054(3)4.839        |
| As2a | 4e        | 1        | 0.4748(1)  | 0.3976(1)  | 0.33689(4)                                     | 0.0045(3)4.939        |
| As2b | 4e        | 1        | 0.0297(1)  | 0.3921(1)  | 0.16408(4)                                     | 0.0052(3)4.903        |
| As3a | 4e        | 1        | 0.7414(1)  | -0.0962(1) | 0.05887(4)                                     | 0.0043(3)4.997        |
| As3b | 4e        | 1        | 0.7604(1)  | -0.4070(1) | -0.05713(4)                                    | 0.0039(3)4.904        |
| As4a | 4e        | 1        | 0.1647(1)  | -0.0449(1) | 0.03494(4)                                     | 0.0036(3)4.957        |
| As4b | 4e        | 1        | 0.6636(1)  | -0.5459(1) | 0.03621(4)                                     | 0.0039(3)4.992        |
| Fe1  | 4e        | 1        | 0.2492(2)  | 0.3451(2)  | 0.25059(5)                                     | 0.0046(3)3.041        |
| Fe2a | 4e        | 1        | 0.4302(1)  | -0.2798(2) | 0.06539(5)                                     | 0.0044(4)3.012        |
| Fe2b | 4e        | 1        | 0.9303(1)  | 0.2205(2)  | 0.06444(5)                                     | 0.0041(4)3.045        |
| O1a  | 4e        | 1        | 0.6205(7)  | 0.4593(9)  | 0.1979(3)                                      | 0.007(2)              |
| O1b  | 4e        | 1        | -0.1279(8) | 0.4451(9)  | 0.3011(3)                                      | 0.008(2)              |
| O2a  | 4e        | 1        | 0.6060(7)  | 0.6980(9)  | 0.2645(3)                                      | 0.007(2)              |
| O2b  | 4e        | 1        | -0.1162(8) | 0.6840(9)  | 0.2349(3)                                      | 0.009(2)              |
| O3a  | 4e        | 1        | 0.3752(7)  | 0.5290(9)  | 0.2363(3)                                      | 0.009(2)              |
| O3b  | 4e        | 1        | 0.1187(8)  | 0.5239(9)  | 0.2626(3)                                      | 0.008(2)              |
| O4a  | 4e        | 1        | 0.5797(7)  | 0.3977(9)  | 0.2899(3)                                      | 0.009(2)              |
| O4b  | 4e        | 1        | -0.0791(7) | 0.3829(9)  | 0.2100(2)                                      | 0.007(2)              |
| O5a  | 4e        | 1        | 0.1867(7)  | 0.3423(9)  | 0.1836(3)                                      | 0.008(2)              |
| O5b  | 4e        | 1        | 0.3151(7)  | 0.3531(9)  | 0.3170(2)                                      | 0.005(2)              |
| O6a  | 4e        | 1        | 0.4765(8)  | 0.574(1)   | 0.3597(3)                                      | 0.012(2) <sup>b</sup> |
| O6b  | 4e        | 1        | 0.0258(8)  | 0.571(1)   | 0.1432(3)                                      | 0.012(2) <sup>b</sup> |
| O7a  | 4e        | 1        | 0.5429(8)  | 0.2492(9)  | 0.3665(2)                                      | 0.008(2)              |
| O7b  | 4e        | 1        | -0.0380(8) | 0.2445(9)  | 0.1324(3)                                      | 0.009(2)              |
| O8a  | 4e        | 1        | 0.7304(7)  | -0.5882(9) | -0.0758(2)                                     | 0.007(1) <sup>b</sup> |
| O8b  | 4e        | 1        | 0.7712(7)  | 0.0858(9)  | 0.0767(3)                                      | 0.007(1) <sup>b</sup> |
| O9a  | 4e        | 1        | 0.5745(7)  | -0.1253(9) | 0.0513(3)                                      | 0.007(2)              |
| O9b  | 4e        | 1        | 0.9277(7)  | -0.3793(9) | -0.0503(3)                                     | 0.007(2)              |
| O10a | 4e        | 1        | 0.6813(8)  | -0.2696(9) | -0.0890(3)                                     | 0.007(2)              |
| O10b | 4e        | 1        | 0.8182(7)  | -0.2343(9) | 0.0895(2)                                      | 0.007(2)              |
| O11a | 4e        | 1        | 0.1998(8)  | 0.1057(9)  | -0.0026(3)                                     | 0.008(2)              |
| O11b | 4e        | 1        | 0.6992(7)  | -0.3946(9) | -0.0013(2)                                     | 0.006(1) <sup>b</sup> |
| O12a | 4e        | 1        | 0.0974(7)  | -0.1939(9) | 0.0042(3)                                      | 0.007(2)              |
| O12b | 4e        | 1        | 0.5955(7)  | -0.6905(9) | 0.0041(2)                                      | 0.006(1) <sup>b</sup> |
| O13a | 4e        | 1        | 0.8069(8)  | -0.5928(9) | 0.0659(3)                                      | 0.009(1) <sup>b</sup> |
| O13b | 4e        | 1        | 0.3080(7)  | -0.0904(9) | 0.0647(2)                                      | 0.006(1) <sup>b</sup> |
| O14a | 4e        | 1        | 0.5544(7)  | -0.4686(9) | 0.0713(3)                                      | 0.007(1) <sup>b</sup> |
| O14b | 4e        | 1        | 0.0562(7)  | 0.0349(9)  | 0.0705(3)                                      | 0.007(1) <sup>b</sup> |

$$^a U_{eq} = 1/3 \left( \sum_{ij} U_{ij} a_i^* b_j^* a_i a_j \right)$$

$$^b U_{iso}$$

Table 4. Atomic parameters and equivalent isotropic displacement parameters for  $\beta$ -Ag<sub>7</sub>Fe<sub>3</sub>(P<sub>2</sub>O<sub>7</sub>)<sub>4</sub> (298 K) and bond valence sums (BVS) for the cations.

| Atom | Wyck. sof | x      | y         | z         | U <sub>eq</sub> <sup>a</sup> (Å <sup>2</sup> ) | BVS            |
|------|-----------|--------|-----------|-----------|------------------------------------------------|----------------|
| Ag1  | 8f        | 0.7(2) | 0.2567(9) | 0.387(1)  | 0.4433(3)                                      | 0.0196(9)1.115 |
| Ag1' | 8f        | 0.3(2) | 0.244(9)  | 0.402(11) | 0.438(4)                                       | 0.028(4) 1.138 |

|       |    |         |            |            |            |           |       |
|-------|----|---------|------------|------------|------------|-----------|-------|
| Ag2   | 8f | 0.90(6) | 0.50562(7) | 0.33123(7) | 0.35626(2) | 0.0334(2) | 0.838 |
| Ag3   | 8f | 0.13(3) | 0.547(4)   | 0.944(3)   | 0.319(2)   | 0.060(4)  | 0.864 |
| Ag3'  | 8f | 0.52(3) | 0.5238(6)  | 0.9297(5)  | 0.3117(4)  | 0.039(1)  | 0.865 |
| Ag3'' | 8f | 0.32(2) | 0.500(1)   | 0.906(2)   | 0.3271(3)  | 0.046(1)  | 0.839 |
| Ag4   | 8f | 0.33(2) | 0.2988(7)  | 0.589(1)   | 0.3484(3)  | 0.049(1)  | 0.937 |
| Ag4'  | 8f | 0.30(2) | 0.2841(8)  | 0.635(2)   | 0.3561(3)  | 0.066(2)  | 0.821 |
| Fe1   | 4e | 1       | 0          | 0.0716(1)  | 1/4        | 0.0080(2) | 2.976 |
| Fe2   | 8f | 1       | 0.31632(6) | 0.97198(7) | 0.43654(2) | 0.0064(1) | 3.062 |
| P1    | 8f | 1       | 0.2977(1)  | 0.2529(1)  | 0.24590(4) | 0.0082(2) | 4.880 |
| P2    | 8f | 1       | 0.2226(1)  | 0.1325(1)  | 0.33540(4) | 0.0081(2) | 4.893 |
| P3    | 8f | 1       | 0.5077(1)  | 0.6602(1)  | 0.44364(4) | 0.0072(2) | 4.919 |
| P4    | 8f | 1       | 0.4180(1)  | 0.7894(1)  | 0.53368(3) | 0.0062(2) | 4.946 |
| O1    | 8f | 1       | 0.3731(4)  | 0.1840(4)  | 0.2054(1)  | 0.0151(8) |       |
| O2    | 8f | 1       | 0.3565(3)  | 0.4097(4)  | 0.2642(1)  | 0.0124(7) |       |
| O3    | 8f | 1       | 0.1377(3)  | 0.2565(4)  | 0.2370(1)  | 0.0125(7) |       |
| O4    | 8f | 1       | 0.3212(3)  | 0.1310(4)  | 0.2904(1)  | 0.0102(6) |       |
| O5    | 8f | 1       | 0.0752(3)  | 0.0816(4)  | 0.3170(1)  | 0.0138(7) |       |
| O6    | 8f | 1       | 0.2246(4)  | 0.2969(4)  | 0.3553(1)  | 0.0162(8) |       |
| O7    | 8f | 1       | 0.2914(4)  | 0.0036(4)  | 0.3666(1)  | 0.0126(7) |       |
| O8    | 8f | 1       | 0.4781(3)  | 0.8285(4)  | 0.4254(1)  | 0.0106(6) |       |
| O9    | 8f | 1       | 0.6650(3)  | 0.6283(4)  | 0.4504(1)  | 0.0109(7) |       |
| O10   | 8f | 1       | 0.4318(4)  | 0.5347(4)  | 0.4148(1)  | 0.0139(7) |       |
| O11   | 8f | 1       | 0.4515(3)  | 0.6548(4)  | 0.4965(1)  | 0.0104(6) |       |
| O12   | 8f | 1       | 0.3465(3)  | 0.9252(4)  | 0.5057(1)  | 0.0092(6) |       |
| O13   | 8f | 1       | 0.5536(3)  | 0.8409(4)  | 0.5597(1)  | 0.0121(7) |       |
| O14   | 8f | 1       | 0.3229(3)  | 0.7106(4)  | 0.5681(1)  | 0.0095(6) |       |

$$^a U_{eq} = 1/3 \left( \sum_{ij} U_{ij} a_i^* b_j^* a_i a_j \right)$$

Table 5. Atomic parameters and equivalent isotropic displacement parameters for  $\beta$ -Ag<sub>7</sub>Fe<sub>3</sub>(As<sub>2</sub>O<sub>7</sub>)<sub>4</sub> (298 K) and bond valence sums (BVS) for the cations.

| Atom   | Wyck. | sof | x       | y          | z          | U <sub>eq</sub> <sup>a</sup> (Å <sup>2</sup> ) | BVS        |       |
|--------|-------|-----|---------|------------|------------|------------------------------------------------|------------|-------|
| Ag1    | 8f    |     | 0.65(6) | 0.2652(4)  | 0.3834(3)  | 0.4480(3)                                      | 0.0179(3)  | 1.065 |
| Ag1'   | 8f    |     | 0.35(6) | 0.256(1)   | 0.3881(10) | 0.4412(6)                                      | 0.0216(8)  | 1.082 |
| Ag2    | 8f    |     | 0.55(5) | 0.515(1)   | 0.3368(5)  | 0.3570(3)                                      | 0.0259(4)  | 0.802 |
| Ag2'   | 8f    |     | 0.28(5) | 0.494(2)   | 0.350(2)   | 0.3507(5)                                      | 0.024(1)   | 0.878 |
| Ag3    | 8f    |     | 0.41(1) | 0.5205(3)  | 0.9403(2)  | 0.3128(2)                                      | 0.0477(8)  | 0.774 |
| Ag3''  | 8f    |     | 0.13(1) | 0.5276(8)  | 0.9656(9)  | 0.2954(9)                                      | 0.22(1)    | 0.924 |
| Ag3''' | 8f    |     | 0.31(1) | 0.4985(3)  | 0.9190(6)  | 0.3288(1)                                      | 0.0497(7)  | 0.741 |
| Ag4    | 8f    |     | 0.26(2) | 0.276(1)   | 0.6002(9)  | 0.3517(2)                                      | 0.051(1)   | 0.861 |
| Ag4'   | 8f    |     | 0.30(1) | 0.3129(6)  | 0.5872(7)  | 0.3453(1)                                      | 0.0374(7)  | 0.965 |
| Ag4''  | 8f    |     | 0.26(1) | 0.7883(7)  | 0.147(1)   | 0.3552(1)                                      | 0.084(2)   | 0.750 |
| As1    | 8f    | 1   |         | 0.29914(3) | 0.27251(4) | 0.24488(1)                                     | 0.00904(5) | 4.904 |
| As2    | 8f    | 1   |         | 0.22055(3) | 0.14531(3) | 0.33709(1)                                     | 0.00873(5) | 4.923 |
| As3    | 8f    | 1   |         | 0.50902(3) | 0.65672(3) | 0.44247(1)                                     | 0.00706(5) | 5.001 |
| As4    | 8f    | 1   |         | 0.41431(3) | 0.79555(3) | 0.53542(1)                                     | 0.00598(5) | 4.961 |
| Fe1    | 4e    | 1   |         | 0          | 0.09580(6) | 1/4                                            | 0.0079(1)  | 3.016 |
| Fe2    | 8f    | 1   |         | 0.31887(4) | 0.97096(4) | 0.43530(1)                                     | 0.00658(7) | 3.047 |
| O1     | 8f    | 1   |         | 0.3741(3)  | 0.1995(3)  | 0.20022(8)                                     | 0.0182(6)  |       |
| O2     | 8f    | 1   |         | 0.3607(2)  | 0.4411(3)  | 0.26531(8)                                     | 0.0159(5)  |       |
| O3     | 8f    | 1   |         | 0.1295(2)  | 0.2761(3)  | 0.23741(8)                                     | 0.0142(5)  |       |
| O4     | 8f    | 1   |         | 0.3294(2)  | 0.1423(3)  | 0.29117(7)                                     | 0.0123(4)  |       |
| O5     | 8f    | 1   |         | 0.0644(2)  | 0.0974(3)  | 0.31632(7)                                     | 0.0157(5)  |       |
| O6     | 8f    | 1   |         | 0.2242(4)  | 0.3220(3)  | 0.3589(1)                                      | 0.0255(7)  |       |
| O7     | 8f    | 1   |         | 0.2876(3)  | -0.0032(3) | 0.36795(7)                                     | 0.0152(5)  |       |
| O8     | 8f    | 1   |         | 0.4785(2)  | 0.8387(2)  | 0.42463(8)                                     | 0.0126(4)  |       |
| O9     | 8f    | 1   |         | 0.6754(2)  | 0.6273(3)  | 0.44999(8)                                     | 0.0131(4)  |       |
| O10    | 8f    | 1   |         | 0.4302(2)  | 0.5209(3)  | 0.41104(8)                                     | 0.0148(5)  |       |
| O11    | 8f    | 1   |         | 0.4502(2)  | 0.6446(2)  | 0.49796(7)                                     | 0.0125(4)  |       |
| O12    | 8f    | 1   |         | 0.3452(2)  | 0.9418(2)  | 0.50413(7)                                     | 0.0108(4)  |       |
| O13    | 8f    | 1   |         | 0.5578(2)  | 0.8422(3)  | 0.56469(8)                                     | 0.0136(4)  |       |
| O14    | 8f    | 1   |         | 0.3067(2)  | 0.7159(3)  | 0.57063(7)                                     | 0.0113(4)  |       |

$$^a U_{eq} = 1/3 \left( \sum_{ij} U_{ij} a_i^* b_j^* a_i a_j \right)$$

Table 6. Second and third order displacement parameters in  $\text{\AA}^2$  for Ag1 (replacing Ag1 and Ag1' in the split-site models) in  $\beta\text{-Ag}_7\text{Fe}_3(\text{P}_2\text{O}_7)_4$  and  $\beta\text{-Ag}_7\text{Fe}_3(\text{As}_2\text{O}_7)_4$  (298 K).

|                 | $\beta\text{-Ag}_7\text{Fe}_3(\text{P}_2\text{O}_7)_4$ | $\beta\text{-Ag}_7\text{Fe}_3(\text{As}_2\text{O}_7)_4$ |
|-----------------|--------------------------------------------------------|---------------------------------------------------------|
| U <sub>11</sub> | 0.0191(2)                                              | 0.0214(1)                                               |
| U <sub>22</sub> | 0.0147(1)                                              | 0.01478(9)                                              |
| U <sub>33</sub> | 0.0401(2)                                              | 0.0335(1)                                               |
| U <sub>12</sub> | -0.0068(1)                                             | -0.00564(8)                                             |
| U <sub>13</sub> | 0.0139(2)                                              | 0.0140(1)                                               |
| U <sub>23</sub> | -0.0115(1)                                             | -0.00878(9)                                             |
| C111            | -0.0007(1)                                             | -0.00053(7)                                             |
| C112            | 0.00077(7)                                             | 0.00047(4)                                              |
| C113            | -0.00034(3)                                            | -0.00020(1)                                             |
| C122            | -0.00094(8)                                            | -0.00040(4)                                             |
| C123            | 0.00041(2)                                             | 0.00021(1)                                              |
| C133            | -0.00016(1)                                            | -0.000081(6)                                            |
| C222            | 0.0010(1)                                              | 0.00052(9)                                              |
| C223            | -0.00048(3)                                            | -0.00019(2)                                             |
| C233            | 0.00017(1)                                             | 0.000063(6)                                             |
| C333            | -0.000063(7)                                           | -0.000023(3)                                            |

Table 7. Distances (Å) between neighbor silver sites and size (Å) of the oxygen windows connecting these sites along the diffusion paths for  $\text{Ag}_7\text{Fe}_3(\text{P}_2\text{O}_7)_4$  and  $\text{Ag}_7\text{Fe}_3(\text{As}_2\text{O}_7)_4$  at 100 and 298 K.

|                                                                                    |          |               |          |
|------------------------------------------------------------------------------------|----------|---------------|----------|
| <b><math>\alpha\text{-Ag}_7\text{Fe}_3(\text{P}_2\text{O}_7)_4</math> (100 K)</b>  |          |               |          |
| Ag1a—Ag1a                                                                          | 3.822(1) | R[9a,9a]      | 1.89(1)  |
| Ag1a—Ag2b                                                                          | 3.664(2) | R[6a,10a,13b] | 1.836(8) |
| Ag1a—Ag4a                                                                          | 3.234(1) | R[6a,10a,14a] | 2.110(8) |
| Ag1a—Ag3a                                                                          | 3.987(2) | R[6a,8b,14a]  | 2.337(8) |
| Ag1b—Ag1b                                                                          | 4.221(2) | R[9b,9b]      | 1.84(1)  |
| Ag1b—Ag2a                                                                          | 3.422(1) | R[6b,10b,13a] | 1.870(8) |
| Ag1b—Ag3b                                                                          | 4.030(2) | R[6b,8a,14b]  | 2.351(8) |
| Ag4a—Ag2b                                                                          | 3.263(1) | R[5a,6a]      | 2.08(1)  |
| Ag4a—Ag3b                                                                          | 3.841(2) | R[3a,8a]      | 2.31(1)  |
| Ag4a—Ag2a                                                                          | 3.498(2) | R[1a,7a,13a]  | 2.503(8) |
| Ag4a—Ag3a                                                                          | 3.291(2) | R[1a,6a]      | 1.88(1)  |
| Ag3a—Ag3b                                                                          | 3.916(2) | R[1a,3b]      | 2.25(1)  |
|                                                                                    |          | R[1b,3a]      | 2.21(1)  |
| <b><math>\alpha\text{-Ag}_7\text{Fe}_3(\text{As}_2\text{O}_7)_4</math> (100 K)</b> |          |               |          |
| Ag1a—Ag1a                                                                          | 3.812(1) | R[9a,9a]      | 1.94(1)  |
| Ag1a—Ag2b                                                                          | 3.768(1) | R[6a,10a,13b] | 1.815(8) |
| Ag1a—Ag4a                                                                          | 3.417(1) | R[6a,10a,14a] | 2.053(8) |
| Ag1a—Ag3a                                                                          | 4.199(1) | R[6a,8b,14a]  | 2.311(8) |
| Ag1b—Ag1b                                                                          | 4.139(3) | R[9b,9b]      | 1.89(1)  |
| Ag1b—Ag2a                                                                          | 3.614(1) | R[6b,10b,13a] | 1.830(8) |
| Ag1b—Ag4b                                                                          | 3.278(7) | R[6b,10b,14b] | 2.092(8) |
| Ag1b—Ag3b                                                                          | 4.268(2) | R[6b,8a,14b]  | 2.335(8) |
| Ag4a—Ag2b                                                                          | 3.261(2) | R[2a,10a]     | 2.15(1)  |
| Ag4a—Ag3b                                                                          | 3.946(2) | R[5a,7a]      | 2.34(1)  |
| Ag4a—Ag2a                                                                          | 3.672(2) | R[1a,7a,13a]  | 2.473(8) |
| Ag4a—Ag3a                                                                          | 3.466(2) | R[1a,6a]      | 1.90(1)  |
| Ag4b—Ag2a                                                                          | 3.045(9) | R[2b,10b]     | 2.13(1)  |
| Ag4b—Ag3a                                                                          | 3.238(9) | R[5b,7b]      | 2.32(1)  |
| Ag4b—Ag2b                                                                          | 3.242(8) | R[1b,7b,13b]  | 2.484(8) |
| Ag4b—Ag3b                                                                          | 3.153(8) | R[1b,6b]      | 1.85(1)  |
| Ag3a—Ag3b                                                                          | 4.159(2) | R[3a,4b]      | 2.28(1)  |
|                                                                                    |          | R[1b,3a]      | 2.22(1)  |
| <b><math>\beta\text{-Ag}_7\text{Fe}_3(\text{P}_2\text{O}_7)_4</math> (298 K)</b>   |          |               |          |
| Ag1—Ag1                                                                            | 3.96(1)  | R[9,9]        | 1.88(2)  |
| Ag1—Ag2                                                                            | 3.553(9) | R[6,10,13]    | 1.883(3) |
| Ag1'—Ag4                                                                           | 3.0(1)   | R[6,10,14]    | 2.152(3) |
| Ag1'—Ag3                                                                           | 3.8(1)   | R[6,8,14]     | 2.357(3) |
| Ag4—Ag2                                                                            | 2.94(1)  | R[5,6]        | 2.157(3) |
| Ag4'—Ag3''                                                                         | 3.22(2)  | R[3,8]        | 2.344(2) |
| Ag4'—Ag2                                                                           | 3.13(1)  | R[1,7,13]     | 2.538(3) |
| Ag4—Ag3                                                                            | 2.78(4)  | R[1,6]        | 1.89(3)  |
| Ag3'—Ag3'                                                                          | 3.48(2)  | R[1,3]        | 2.232(2) |
| <b><math>\beta\text{-Ag}_7\text{Fe}_3(\text{As}_2\text{O}_7)_4</math> (298 K)</b>  |          |               |          |
| Ag1—Ag1                                                                            | 3.82(1)  | R[9,9]        | 1.908(2) |
| Ag1'—Ag2'                                                                          | 3.65(2)  | R[6,10,13]    | 1.834(2) |
| Ag1'—Ag4                                                                           | 3.19(2)  | R[6,10,14]    | 2.075(2) |
| Ag1'—Ag3''                                                                         | 4.03(1)  | R[6,8,14]     | 2.327(2) |
| Ag4'—Ag2'                                                                          | 2.71(2)  | R[2,10]       | 2.151(2) |
| Ag4''—Ag3''                                                                        | 3.26(1)  | R[5,7]        | 2.352(2) |
| Ag4''—Ag2                                                                          | 3.17(1)  | R[1,7,13]     | 2.504(2) |
| Ag4—Ag3                                                                            | 3.04(1)  | R[1,6]        | 1.888(2) |
| Ag3'—Ag3'                                                                          | 2.66(4)  | R[1,3]        | 2.266(2) |
